# Supplementary material
Source: PubMed Central journal article supplement (PMC4371951)
Supplement: pnas.201424670SI.pdf [file pnas.201424670SI.pdf]

# Supporting Information

Futahashi et al. 10.1073/pnas.1424670112

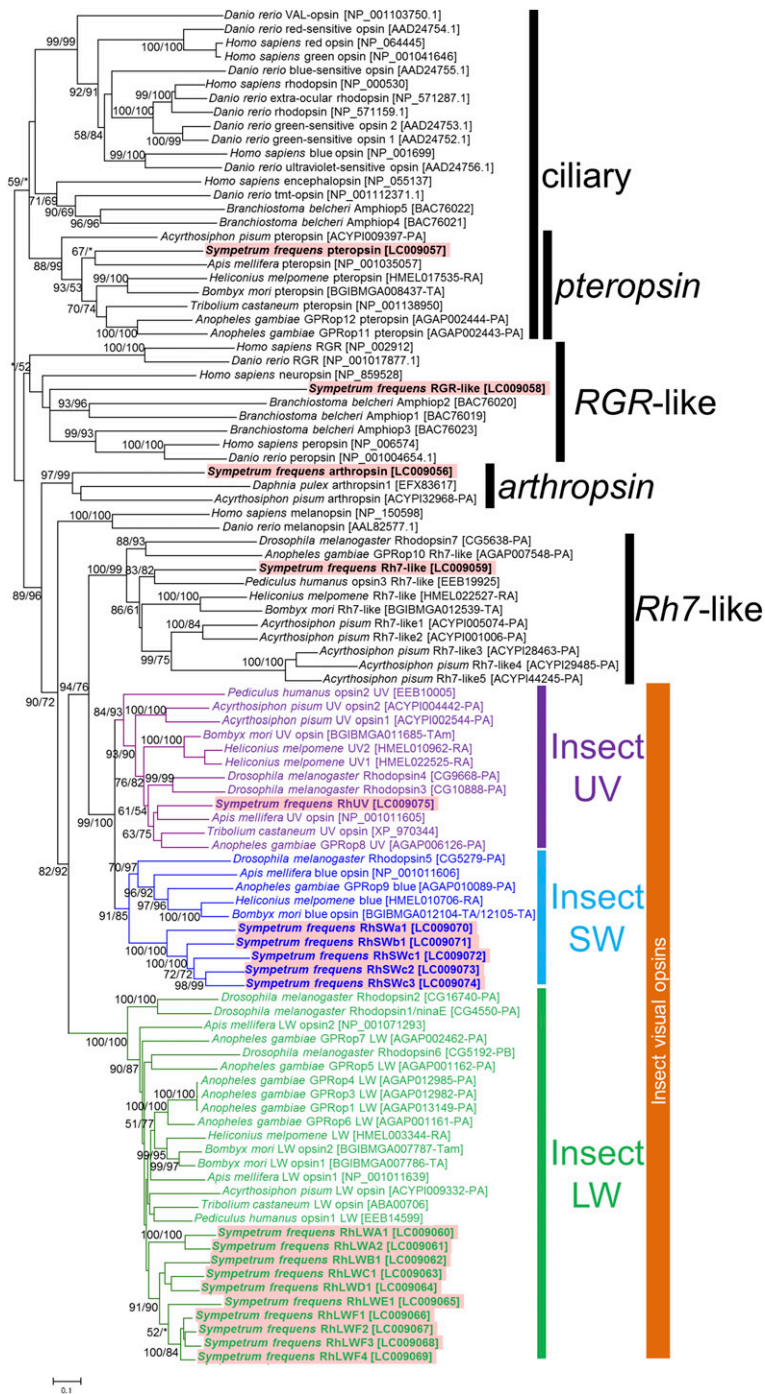

**Fig. S1.** Phylogenetic relationship of 20 opsin genes of the red dragonfly *Sympetrum frequens* (red shade) to opsin genes of diverse insects and other animals. A neighbor-joining phylogeny inferred from 858 aligned amino acid sites is shown, and maximum-likelihood phylogeny exhibited substantially similar topologies. On each node, bootstrap values are indicated in the order of neighbor-joining method/maximum-likelihood method. Asterisks indicate support values lower than 50%. Accession numbers or annotation IDs are in brackets. Classification of the opsin genes is indicated on the right side. Insect visual opsin genes are highlighted in purple for UV type, in blue for short-wavelength (SW) type, and in green for long-wavelength (LW) type, respectively.

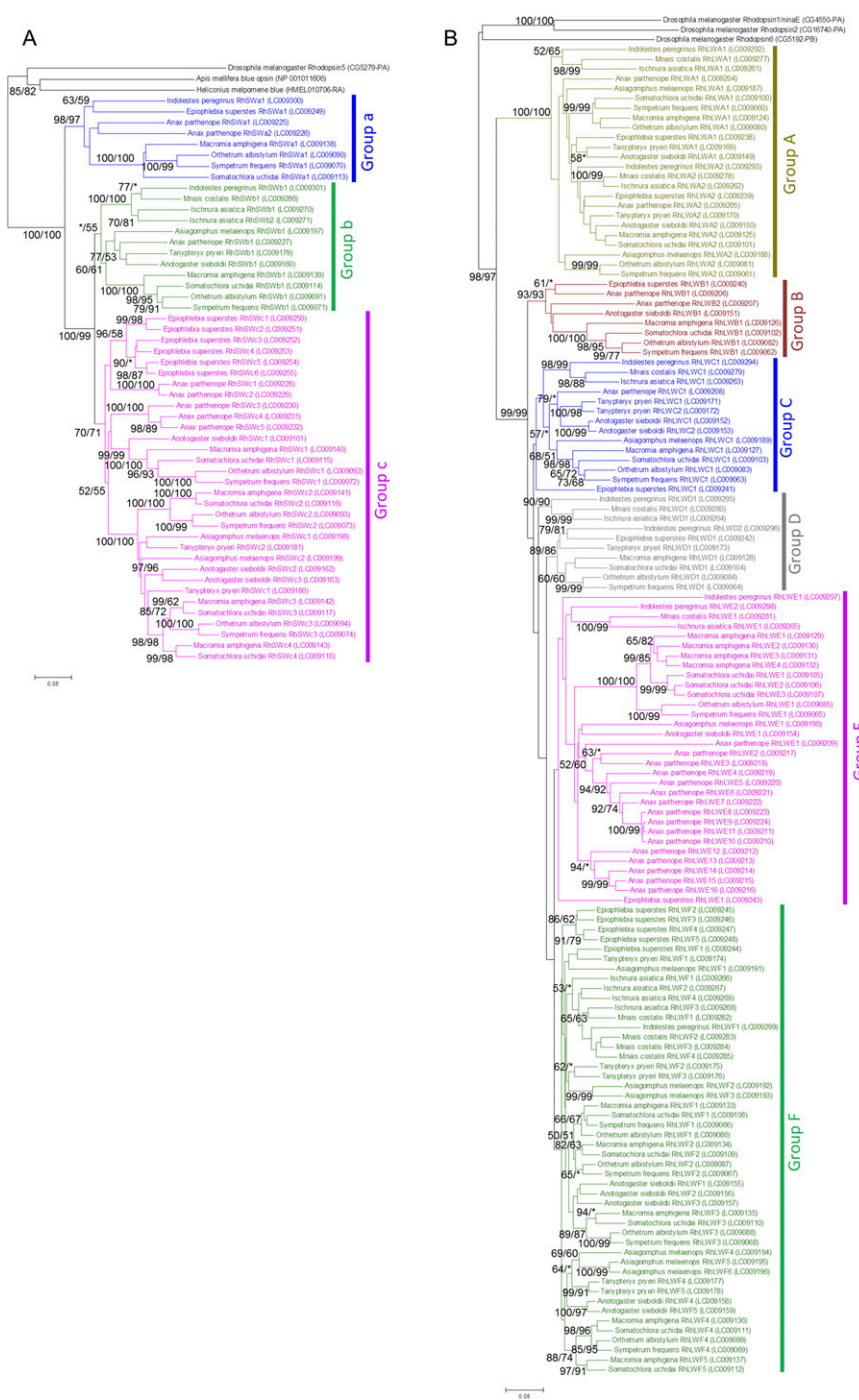

**Fig. 52.** Molecular phylogenetic analyses of visual opsin genes of SW type and LW type identified from diverse dragonfly species examined in this study. (A) A neighbor-joining phylogeny of SW opsin genes inferred from 409 aligned amino acid sites. (B) A neighbor-joining phylogeny of LW opsin genes inferred from 404 aligned amino acid sites. Bootstrap values are indicated at the nodes in the order of neighbor-joining method/maximum-likelihood method. Asterisks indicate support values lower than 50%. Visual opsin groups are shown on the right side in different colors. Accession numbers or annotation IDs are in parentheses.

**Table S1. Dragonfly samples and RNA sequencing reads**

| Species                      | Locality*           | Date     | Coll <sup>†</sup> | Tissue <sup>‡</sup> | No. of pairs | HiSeq/MiSeq         | Accession no. |
|------------------------------|---------------------|----------|-------------------|---------------------|--------------|---------------------|---------------|
| <i>Sympetrum frequens</i>    | Tsukuba, Ibaraki    | 10/06/12 | RF                | Adult DCE           | 5,923,205    | HiSeq 100 bp paired | DRA001792     |
|                              | Tsukuba, Ibaraki    | 10/11/14 | RF                | Adult DCE           | 1,010,242    | MiSeq 300 bp paired | DRA002790     |
|                              | Tsukuba, Ibaraki    | 10/06/12 | RF                | Adult VCE           | 7,123,105    | HiSeq 100 bp paired | DRA001793     |
|                              | Tsukuba, Ibaraki    | 10/10/14 | RF                | Adult VCE           | 1,178,286    | MiSeq 300 bp paired | DRA002791     |
|                              | Ishioka, Ibaraki    | 06/10/14 | RF                | Adult ocelli        | 10,571,567   | HiSeq 100 bp paired | DRA002482     |
|                              | Ishioka, Ibaraki    | 06/10/14 | RF                | Adult ocelli        | 12,768,046   | HiSeq 100 bp paired | DRA002485     |
|                              | Ishioka, Ibaraki    | 06/10/14 | RF                | Larval head         | 7,272,069    | HiSeq 100 bp paired | DRA002486     |
|                              | Ishioka, Ibaraki    | 06/10/14 | RF                | Larval head         | 2,857,714    | MiSeq 300 bp paired | DRA002781     |
| <i>Orthetrum albistylum</i>  | Tsukuba, Ibaraki    | 07/19/13 | RF                | Adult DCE           | 13,967,030   | HiSeq 100 bp paired | DRA001714     |
|                              | Tsukuba, Ibaraki    | 06/30/14 | RF                | Adult DCE           | 6,071,312    | HiSeq 100 bp paired | DRA002456     |
|                              | Tsukuba, Ibaraki    | 07/19/13 | RF                | Adult VCE           | 14,111,614   | HiSeq 100 bp paired | DRA001715     |
|                              | Tsukuba, Ibaraki    | 06/30/14 | RF                | Adult VCE           | 8,243,762    | HiSeq 100 bp paired | DRA002457     |
|                              | Tsukuba, Ibaraki    | 06/30/14 | RF                | Adult ocelli        | 7,588,324    | HiSeq 100 bp paired | DRA002458     |
|                              | Tsukuba, Ibaraki    | 06/30/14 | RF                | Adult ocelli        | 2,429,276    | MiSeq 300 bp paired | DRA002806     |
|                              | Tsukuba, Ibaraki    | 07/19/13 | RF                | Larval head         | 9,934,714    | HiSeq 100 bp paired | DRA001718     |
|                              | Fuchu, Toyama       | 05/25/14 | HF                | Larval head         | 7,312,210    | HiSeq 100 bp paired | DRA002459     |
| <i>Somatochlora uchidai</i>  | Osawano, Toyama     | 06/29/14 | OS                | Adult DCE           | 1,713,912    | MiSeq 300 bp paired | DRA002773     |
|                              | Osawano, Toyama     | 06/29/14 | OS                | Adult VCE           | 1,693,986    | MiSeq 300 bp paired | DRA002774     |
|                              | Osawano, Toyama     | 06/29/14 | OS                | Adult ocelli        | 1,672,847    | MiSeq 300 bp paired | DRA002775     |
|                              | Shogawa, Toyama     | 06/15/14 | HF                | Larval head         | 1,233,017    | MiSeq 300 bp paired | DRA002776     |
|                              | Shogawa, Toyama     | 09/05/12 | HF                | Adult head          | 13,317,560   | HiSeq 100 bp paired | DRA001780     |
| <i>Macromia amphigena</i>    | Ishioka, Ibaraki    | 06/10/14 | RF                | Adult DCE           | 2,163,042    | MiSeq 300 bp paired | DRA002777     |
|                              | Ishioka, Ibaraki    | 06/10/14 | RF                | Adult VCE           | 2,547,572    | MiSeq 300 bp paired | DRA002778     |
|                              | Ishioka, Ibaraki    | 06/10/14 | RF                | Adult ocelli        | 2,288,712    | MiSeq 300 bp paired | DRA002779     |
|                              | Hitachiota, Ibaraki | 06/20/14 | RF                | Larval head         | 1,948,611    | MiSeq 300 bp paired | DRA002780     |
| <i>Anotogaster sieboldii</i> | Osawano, Toyama     | 06/12/13 | HF                | Adult head          | 20,059,678   | HiSeq 100 bp paired | DRA002395     |
|                              | Osawano, Toyama     | 06/08/14 | OS                | Adult DCE           | 13,298,123   | HiSeq 100 bp paired | DRA002490     |
|                              | Osawano, Toyama     | 06/08/14 | OS                | Adult VCE           | 14,045,045   | HiSeq 100 bp paired | DRA002491     |
|                              | Osawano, Toyama     | 06/08/14 | OS                | Adult ocelli        | 14,165,214   | HiSeq 100 bp paired | DRA002487     |
|                              | Fuchu, Toyama       | 05/11/14 | HF                | Larval head         | 13,333,786   | HiSeq 100 bp paired | DRA002489     |
| <i>Tanypteryx pryeri</i>     | Tsukuba, Ibaraki    | 09/06/12 | RF                | Adult head          | 11,412,005   | HiSeq 100 bp paired | DRA001779     |
|                              | Fuchu, Toyama       | 05/13/14 | HF                | Adult DCE           | 6,325,017    | HiSeq 100 bp paired | DRA002497     |
|                              | Fuchu, Toyama       | 05/13/14 | HF                | Adult VCE           | 12,112,423   | HiSeq 100 bp paired | DRA002498     |
|                              | Fuchu, Toyama       | 05/13/14 | HF                | Adult ocelli        | 16,382,746   | HiSeq 100 bp paired | DRA002499     |
|                              | Fuchu, Toyama       | 06/02/14 | HF                | Larval head         | 1,702,766    | MiSeq 300 bp paired | DRA002771     |
| <i>Asiagomphus melaenops</i> | Kosugi, Toyama      | 06/11/14 | HF                | Adult DCE           | 17,414,315   | HiSeq 100 bp paired | DRA002345     |
|                              | Kosugi, Toyama      | 06/11/14 | HF                | Adult VCE           | 14,545,756   | HiSeq 100 bp paired | DRA002346     |
|                              | Kosugi, Toyama      | 06/11/14 | HF                | Adult ocelli        | 17,723,205   | HiSeq 100 bp paired | DRA002347     |
|                              | Fuchu, Toyama       | 05/11/14 | HF                | Larval head         | 15,526,427   | HiSeq 100 bp paired | DRA002344     |
|                              | Kosugi, Toyama      | 06/04/13 | HF                | Adult head          | 16,233,972   | HiSeq 100 bp paired | DRA002343     |
| <i>Anax parthenope</i>       | Daimon, Toyama      | 06/08/14 | HF                | Adult DCE           | 9,868,671    | HiSeq 100 bp paired | DRA002495     |
|                              | Daimon, Toyama      | 06/08/14 | HF                | Adult VCE           | 7,086,216    | HiSeq 100 bp paired | DRA002496     |
|                              | Daimon, Toyama      | 06/08/14 | HF                | Adult ocelli        | 7,472,432    | HiSeq 100 bp paired | DRA002492     |
|                              | Fuchu, Toyama       | 06/07/14 | HF                | Larval head         | 12,223,100   | HiSeq 100 bp paired | DRA002494     |
|                              | Tsukuba, Ibaraki    | 09/06/12 | RF                | Adult head          | 14,338,966   | HiSeq 100 bp paired | DRA001761     |
| <i>Epiophlebia superstes</i> | Toyota, Aichi       | 06/04/13 | TO                | Adult DCE           | 15,005,865   | HiSeq 100 bp paired | DRA001755     |
|                              | Toyota, Aichi       | 06/04/13 | TO                | Adult VCE           | 12,759,491   | HiSeq 100 bp paired | DRA001756     |
|                              | Toyota, Aichi       | 06/04/13 | TO                | Adult ocelli        | 23,218,570   | HiSeq 100 bp paired | DRA001757     |
|                              | Izu, Shizuoka       | 05/16/13 | MM                | Larval head         | 16,087,287   | HiSeq 100 bp paired | DRA001758     |
| <i>Ichnura asiatica</i>      | Tsukuba, Ibaraki    | 06/27/14 | RF                | Adult DCE           | 2,864,655    | MiSeq 300 bp paired | DRA002766     |
|                              | Tsukuba, Ibaraki    | 06/27/14 | RF                | Adult VCE           | 3,031,300    | MiSeq 300 bp paired | DRA002767     |
|                              | Tsukuba, Ibaraki    | 06/27/14 | RF                | Adult ocelli        | 4,717,947    | MiSeq 300 bp paired | DRA002768     |
|                              | Tsukuba, Ibaraki    | 06/19/14 | RF                | Larval head         | 5,178,312    | MiSeq 300 bp paired | DRA002769     |
|                              | Fukumitsu, Toyama   | 06/15/09 | HF                | Adult head          | 12,325,897   | HiSeq 100 bp paired | DRA002352     |
|                              | Fukumitsu, Toyama   | 06/15/09 | HF                | Adult head          | 13,226,569   | HiSeq 100 bp paired | DRA002354     |
| <i>Mnais costalis</i>        | Yatsuo, Toyama      | 04/07/14 | HF                | Adult DCE           | 3,131,184    | MiSeq 300 bp paired | DRA002761     |
|                              | Yatsuo, Toyama      | 04/07/14 | HF                | Adult VCE           | 5,726,678    | MiSeq 300 bp paired | DRA002762     |
|                              | Yatsuo, Toyama      | 04/07/14 | HF                | Adult ocelli        | 4,462,057    | MiSeq 300 bp paired | DRA002763     |
|                              | Yatsuo, Toyama      | 04/02/14 | HF                | Larval head         | 4,713,722    | MiSeq 300 bp paired | DRA002764     |
|                              | Yatsuo, Toyama      | 04/21/09 | HF                | Adult head          | 3,418,080    | HiSeq 100 bp paired | DRA002390     |
|                              | Himi, Toyama        | 05/26/13 | HF                | Adult head          | 12,479,282   | HiSeq 100 bp paired | DRA002393     |

**Table S1. Cont.**

| Species                      | Locality*        | Date     | Coll <sup>†</sup> | Tissue <sup>‡</sup> | No. of pairs | HiSeq/MiSeq         | Accession no. |
|------------------------------|------------------|----------|-------------------|---------------------|--------------|---------------------|---------------|
| <i>Indolestes peregrinus</i> | Ishioka, Ibaraki | 06/10/14 | RF                | Adult DCE           | 7,842,957    | HiSeq 100 bp paired | DRA002455     |
|                              | Ishioka, Ibaraki | 06/10/14 | RF                | Adult VCE           | 8,015,409    | HiSeq 100 bp paired | DRA002460     |
|                              | Ishioka, Ibaraki | 06/10/14 | RF                | Adult ocelli        | 6,668,121    | HiSeq 100 bp paired | DRA002461     |
|                              | Tsukuba, Ibaraki | 07/19/13 | RF                | Larval head         | 9,260,913    | HiSeq 100 bp paired | DRA001744     |

\*All localities are in Japan.

<sup>†</sup>Collector: HF, Hiroyuki Futahashi; MM, Makoto Machida; OS, Osamu Shimbori; RF, Ryo Futahashi; TO, Tooru Oono.

<sup>‡</sup>DCE, dorsal compound eyes; head, whole head; ocelli, head region with ocelli; VCE, ventral compound eyes.

## Other Supporting Information Files

[Dataset S1 \(XLSX\)](#)
